# Supplementary material
Source: publisher figshare collection journal article supplement (https://gsapubs.figshare.com/ndownloader/files/23303339)
Supplement: Supplementary file 1 [file 23303339]

## Sheet: carbon oxygen isotopes
Sample no	Grid reference	Rock type	d13CVPDB (‰)	d18OVPDB (‰)	d18OVSMOW (‰)
47f	36R 0496064 3229475	Limestone	0.5	-7.18	23.1
60a	36R 0498893.9 3230141	Limestone	-0.25	-6.32	24.39
60c	36R 0498893.9 3230141	Limestone	-0.65	-6.64	24.06
60a (r)	36R 0498893.9 3230142	Limestone	-0.19	-6.24	24.48
68n-1	36R 0495956 3229601	Limestone	0.97	-5.41	25.33
78c-1	36R 0499080 3230390	Limestone	0.79	-5.46	25.29
80b-4	36R 0497673 3228917	Limestone	1.04	-6.47	24.24
47g-1	36R 0496064 3229475	Limestone	0.36	-7.13	23.56
47g-1 (r)	36R 0496064 3229476	Limestone	0.53	-6.51	24.2
47g-2	36R 0496064 3229475	Limestone	0.56	-6.56	24.14
68n-2	36R 0495956 3229601	Limestone	0.94	-5.85	24.88
77d	36R 0497726 3228925	Limestone	0.89	-5.88	24.85
71d-2	36R 0495686 3230308	Limestone	-0.69	-6.7	24
82m-1	36R 0495732 3229826	Limestone	0.7	-5.12	25.65
82m-2	36R 0495732 3229826	Limestone	-0.45	-7.8	22.87
37a	36R 0496916 3232818	Limestone	0.06	-6.75	23.95
JH-47C	36R 0496064 3229475	Limestone	0.688255	-6.5654	24.1417
JH-1D	36R 0497774 3233343	Limestone	-1.00498	-3.45383	27.3494
15b	36R 0499640 3232716	Limestone	0.18	-6.13	24.59
48a	36R 0499370 3232865	Limestone	-0.27	-4.96	25.8
15a	36R 0499640 3232716	Limestone	0.28	-5.6	25.1
21	36R 0498824 3233315	Limestone	0.1	-5.9	24.8
22a	36R 0498629 3233328	Limestone	0.7	-3.5	27.3
66a	36R 0498348 3233131	Limestone	-0.2	-3.1	27.7
JH-38G2	36R 0497697 3229010	Stratabound dolomite	-1.34561	-4.93534	25.8221
81b	36R 0498421 3229427	Stratabound dolomite	0.93	-3.62	27.17
80d-1	36R 0497738 3228945	Stratabound dolomite	-1.05	-5.8	24.94
81d-2a	36R 0498599 3229687	Stratabound dolomite	0.57	-5.81	24.93
JH-38F1	36R 0497697 3229010	Stratabound dolomite	-0.240544	-5.76774	24.964
JH-38G1	36R 0497697 3229010	Stratabound dolomite	-1.66973	-7.16649	23.522
38b	36R 0497697 3229010	Stratabound dolomite	-1.6	-5.5	25.24
53b	36R 0497334 3229385	Stratabound dolomite	0.54	-6.37	24.34
81f-1	36R 0498666 3229872	Stratabound dolomite	-1.05	-8.04	22.62
JH-5A	36R 0495938 3229625	Stratabound dolomite	0.799495	-5.057	25.6967
JH-16C	36R 0496272 3229315	Stratabound dolomite	-0.395676	-5.65875	25.0763
JH-24	36R 0496179 3229647	Stratabound dolomite	0.879041	-5.4197	25.3228
JH-12	36R 0497334 3229385	Stratabound dolomite	0.43048	-5.82042	24.9097
JH-53C	36R 0497334 3229385	Stratabound dolomite	-0.0560374	-6.46481	24.2454
JH-53D1	36R 0497334 3229385	Stratabound dolomite	-0.595036	-5.91262	24.8146
11b	36R 0497697 3229010	Stratabound dolomite	-0.68	-5.23	25.52
68r	36R 0496034 3229683	Stratabound dolomite	1.17	-5.97	24.75
80a-1a	36R 0497673 3228917	Stratabound dolomite	-0.33	-6.65	24.06
81a	36R 0498389 3229414	Stratabound dolomite	0.51	-5.83	24.9
81b	36R 0498421 3229427	Stratabound dolomite	0.93	-3.62	27.17
81b (r)	36R 0498421 3229428	Stratabound dolomite	0.84	-3.52	27.28
JH-41	36R 0495680 3229920	Massive dolomite	-0.26714	-8.75052	21.889
JH-56A	36R 0495953 3229677	Massive dolomite	0.22749	-5.46645	25.2746
JH-34C	36R 0496003 3229385	Massive dolomite	1.08731	-4.92282	25.835
JH-40H	36R 0496338 3229280	Massive dolomite	-2.32981	-6.71635	23.986
JH-55B	36R 0495950 3229627	Massive dolomite	0.806189	-7.76642	22.9035
19a	36R 0496066 3229544	Massive dolomite	-0.24	-6.1	24.63
65a-1	36R 0495856 3229753	Massive dolomite	-1.48	-7.04	23.65
65m-2	36R 0495856 3229754	Massive dolomite	-2.14	-10.46	20.12
68p-1	36R 0495956 3229601	Massive dolomite	0.26	-7.44	23.24
73f-2	36R 0495982 3229524	Massive dolomite	0.22	-4.5	26.27
76a	36R 0496165 3229437	Massive dolomite	0.52	-6.02	24.71
82g	36R 0495732 3229826	Massive dolomite	-1.44	-6.88	23.82
82h	36R 0495732 3229826	Massive dolomite	-0.65	-8.68	21.96
20a-1	36R 0496272 3229315	Massive dolomite	-2.8	-6.4	24.3
58c	36R 0495928 3229565	Massive dolomite	-0.05	-5.8	24.9
58d2	36R 0495928 3229565	Massive dolomite	0.5	-5.1	25.7
58f	36R 0495928 3229565	Massive dolomite	0.8	-4.9	25.8
65b	36R 0495856 3229753	Massive dolomite	-1.9	-6.3	24.4
65e -2	36R 0495856 3229754	Massive dolomite	-1.6	-10.5	20.1
65j	36R 0495856 3229753	Massive dolomite	-2.2	-12	18.5
65n	36R 0495856 3229753	Massive dolomite	-1	-8.6	22.1
68p-1	36R 0495956 3229601	Massive dolomite	0.26	-7.44	23.24
65q	36R 0495856 3229753	Massive dolomite	-1.1	-10.8	19.8
65t	36R 0495856 3229753	Massive dolomite	0.32	-7.86	22.81
65v-3	36R 0495856 3229753	Massive dolomite	0.2	-7.9	22.8
65x-2	36R 0495916 3229866	Massive dolomite	0.6	-7	23.7
73e -2	36R 0495960 3229515	Massive dolomite	1.2	-5.2	25.6
73f-1	36R 0495960 3229515	Massive dolomite	1	-4.4	26.4
74a	36R 0495917 3229561	Massive dolomite	0.9	-9.3	21.3
74b	36R 0495917 3229561	Massive dolomite	0.9	-10.1	20.5
76c-1	36R 0496165 3229375	Massive dolomite	-1.2	-11.3	19.3
82a	36R 0495732 3229826	Massive dolomite	-0.2	-9.1	21.6
82e -2	36R 0495732 3229827	Massive dolomite	0.5	-5.9	24.9
82j-2	36R 0495732 3229826	Massive dolomite	0.1	-7.3	23.4
84c-1	36R 0495959 3229684	Massive dolomite	0.6	-5.1	25.7
84e -1	36R 0495959 3229684	Massive dolomite	0.7	-6.6	24.1
86a-2	36R 0495786 3230009	Massive dolomite	0.6	-7	23.7

## Sheet: Sr isotope
SAMPLE	Sample description	87Sr/86Sr	Standard Error (1 sigma)
66A	Pelagic wackestone	0.707814	6e-06
21	Pelagic wackestone	0.707789	3e-06
22A	Pelagic wackestone	0.708056	4e-06
73F2	Massive dolomite - South	0.708576	3e-06
19A	Massive dolomite - South	0.708356	3e-06
34C	Massive dolomite - South	0.707992	3e-06
40H	Massive dolomite - South	0.708379	4e-06
73F1	Massive dolomite - South	0.7083	4e-06
76A	Massive dolomite - South	0.708125	6e-06
76C1	Massive dolomite - South	0.708161	5e-06
68P1	Massive dolomite - North	0.708462	5e-06
86A2	Massive dolomite - North	0.707814	4e-06
82H	Massive dolomite - North	0.708133	3e-06
82A	Massive dolomite - North	0.708495	5e-06
65M2	Massive dolomite - North	0.708175	4e-06
65N	Massive dolomite - North	0.708539	6e-06
53B	Stratabound dolomite	0.708241	5e-06
53C	Stratabound dolomite	0.708062	3e-06
68R	Stratabound dolomite	0.708127	3e-06
80D1	Stratabound dolomite	0.70818	4e-06
81D2A	Stratabound dolomite	0.708139	5e-06

## Sheet: REE
Sample no	Dolomite/Calcite type	La	Ce	Pr	Nd	Sm	Eu	Gd	Tb	Dy	Ho	Er	Tm	Yb	Lu
66A	Pelagic wackestone	0.130515	0.0266621	0.0903063	0.104697	0.128131	0.171458	0.202744	0.186084	0.201696	0.226732	0.235461		0.203411	0.209599
21	Pelagic wackestone	0.138509	0.0496944	0.100302	0.106926	0.130438	0.168114	0.198673	0.175531	0.193116	0.220554	0.234644		0.230216	0.237621
22A	Pelagic wackestone	0.100098	0.0260069	0.0745683	0.0840465	0.105611	0.142695	0.171203	0.15709	0.171485	0.197498	0.208866		0.210308	0.221979
34C	stratabound dolomite	0.0135337	0.00438272	0.00841401	0.00898044	0.0112692	0.0176634	0.0198591	0.0171276	0.0187672	0.0220641	0.0218923		0.0160113	0.0150749
53B	stratabound dolomite	0.0209876	0.00745053	0.0107019	0.0120246	0.0134389	0.0194279	0.0232244	0.0191013	0.0214882	0.0251868	0.0250525		0.0157641	0.015614
53C	stratabound dolomite	0.0240984	0.00692824	0.0113245	0.0117504	0.0131578	0.0181378	0.0220518	0.0186365	0.0202851	0.0246332	0.0254118		0.0188148	0.0181579
12	stratabound dolomite	0.0320872	0.0092146	0.0149705	0.0161075	0.0170633	0.0237876	0.0303091	0.0254832	0.0280664	0.0339225	0.0354146		0.0270106	0.0261779
81A	stratabound dolomite	0.0234595	0.00519204	0.0117449	0.0128701	0.0143819	0.0200711	0.0252041	0.021265	0.0241403	0.0294359	0.0327575		0.025872	0.0261592
11B	stratabound dolomite	0.0153161	0.00261043	0.00562908	0.00587753	0.00578133	0.0105183	0.0124182	0.0109335	0.0131051	0.016639	0.0178281		0.0140273	0.013837
80A1A	stratabound dolomite	0.0232274	0.00514341	0.0123292	0.0134902	0.0150917	0.0223219	0.0271025	0.0225923	0.0259656	0.0303667	0.0312827		0.0248929	0.0241573
73F2	Massive dolomite	0.0810272	0.0380714	0.0630299	0.0693837	0.0821413	0.111266	0.117685	0.104836	0.109996	0.116412	0.11869		0.09466	0.090584
19A	Massive dolomite	0.0721449	0.0323545	0.055484	0.0624298	0.0777411	0.109049	0.112578	0.0975232	0.0996031	0.105564	0.100838		0.0738638	0.0702204
76A	Massive dolomite	0.0748935	0.024268	0.0503328	0.0566003	0.066681	0.090511	0.103278	0.087025	0.0907144	0.0998713	0.101036		0.0768907	0.0724037
76C1	Massive dolomite	0.0865267	0.0306671	0.0549187	0.0600151	0.0708358	0.194731	0.109494	0.0949388	0.100219	0.11075	0.112037		0.0912963	0.0851402
68P1	Massive dolomite	0.0653373	0.0329254	0.0514804	0.0587413	0.0723556	0.0903959	0.101061	0.0882968	0.0895074	0.0951716	0.092416		0.0734465	0.0707313
82H	Massive dolomite	0.0525111	0.0224024	0.0348565	0.036645	0.0439186	0.0565558	0.0646692	0.0546122	0.0563497	0.0611393	0.0595997		0.0505554	0.0505962
82A	Massive dolomite	0.0681057	0.0221745	0.0389579	0.040736	0.0446852	0.060794	0.0714629	0.0595262	0.0644918	0.0731834	0.0760922		0.0671514	0.0689944
65M2	Massive dolomite	0.0360388	0.0100413	0.0173391	0.0184156	0.0206918	0.0293843	0.0357985	0.0285958	0.0290218	0.0333763	0.031747		0.0228613	0.0215031
65N	Massive dolomite	0.0504322	0.0172966	0.0337728	0.0385077	0.0445811	0.0612002	0.0713209	0.0630703	0.0696274	0.0767753	0.0793948		0.0646204	0.0629466
56A	Massive dolomite	0.0702241	0.0269717	0.0504005	0.0551265	0.066134	0.0887558	0.100703	0.0872364	0.0920916	0.100667	0.0985357		0.0775178	0.0718022
41	Massive dolomite	0.0301398	0.00777729	0.0143936	0.0157199	0.0176942	0.0258535	0.0321489	0.0269439	0.0297529	0.0359878	0.0379103		0.0282532	0.0275772
74A	Massive dolomite	0.0713477	0.0304877	0.0594374	0.0678272	0.0883528	0.122893	0.127374	0.111047	0.112723	0.118865	0.11326		0.0870863	0.0809887
65A1	Massive dolomite	0.0657431	0.0220704	0.0428662	0.0483957	0.0565196	0.0753586	0.0880075	0.075395	0.0785497	0.0882749	0.0858169		0.0690921	0.0669168
68T	Massive dolomite	0.0818178	0.0232646	0.0501068	0.0556206	0.0609667	0.0796214	0.0966339	0.0814643	0.0872306	0.0941324	0.0935056		0.0765644	0.0739535
5A	Massive dolomite	0.0618906	0.0200585	0.0372012	0.0407522	0.0445243	0.0586431	0.0701786	0.0604013	0.0645014	0.07296	0.07329		0.0596301	0.0563732
68R	Massive dolomite	0.060828	0.0139563	0.0344978	0.0385888	0.0445192	0.0603897	0.0748489	0.0652051	0.0704237	0.0777482	0.0799713		0.0603159	0.0580386
24	Massive dolomite	0.0529034	0.0179834	0.0288132	0.0321888	0.039521	0.0708568	0.0631517	0.0552963	0.0595165	0.0671194	0.0662495		0.0504459	0.0468904

## Sheet: major trace element
Sanple no.	Dolomite/Calcite type	Fe (ppm)	Mn (ppm)	Mg (ppm)	Al (ppm)	Sr (ppm)	Ca (ppm)	Ni (ppm)	Ba (ppm)
22a	Limestone	2648.19	14.4989	12362.5	2304.9	1774.84	304691	48.8273	21.5352
66a	Limestone	1753.23	21.5385	4492.31	1928.21	1012.1	320615	29.5385	8
47d	Limestone	2143.12	14.6789	2126.61	2216.51	933.394	314862	42.5688	32.4771
22a	Slope - Wackestone	2648.19	14.4989	12362.5	2304.9	1774.84	304691	48.8273	21.5352
66a	Slope - wackestone	1753.23	21.5385	4492.31	1928.21	1012.1	320615	29.5385	8
47d	Slope - Neomorphosed	2143.12	14.6789	2126.61	2216.51	933.394	314862	42.5688	32.4771
jh11b	stratabound dolomite	45.2191	412.351	92589.6	51.1952	87.4312		0.991272	49.4556
jh24	stratabound dolomite	478.806	360.995	79422.9	310.846	226.994		5.20228	211.632
jh38a	stratabound dolomite	55.8882	936.527	57405.2	146.307	164.623		9.36623	100.022
jh38b	stratabound dolomite	174.379	421.053	90168.8	187.289	109.534		2.36733	40.5913
38b	stratabound dolomite	245.805	234.137	41668.3	104.532	58.6307	99517.8	2.98939	18.4185
68r	stratabound dolomite	386.181	200.934	78898.2	341.55	180.392	189169	6.34921	30.9991
70c	stratabound dolomite	86.2745	458.235	78137.3	89.4118	208.039	227451	4.11765	27.2549
80b-1b	stratabound dolomite	136.436	1592.87	3908.91	112.673	113.663	344554	5.54455	5.94059
81a	stratabound dolomite	85.0618	263.939	85537.6	173.93	200	191817	2.28354	22.8354
81f1	stratabound dolomite	261.1	231.238	85088.4	163.065	171.12	205108	3.92927	256.582
jh41	Massive dolomite	204.771	705.169	85725.6	71.9682	86.9992		1.61385	24.5789
jh56a	Massive dolomite	947.619	695.238	82916.7	481.548	146.281		10.8324	11.401
58c	Massive dolomite	1141.98	525.743	81405.9	237.822	251.287	260396	4.35644	80.396
58d	Massive dolomite	1290.4	594.8	93920	271.8	212.6	231400	5.8	281.4
58e	Massive dolomite	4898.15	743.889	45703.7	352.037	154.259	266111	18.7037	476.296
58f	Massive dolomite	1307.52	414.257	83544.6	491.485	248.119	211683	6.53465	108.317
65a	Massive dolomite	1826.52	537.311	81780.3	535.227	191.477	187159	14.2045	21.0227
65b	Massive dolomite	4276.64	549.533	87925.2	493.458	206.542	212710	8.03738	11.4019
65e	Massive dolomite	1434.42	1204.42	83788.5	243.846	173.077	214231	8.26923	344.615
65f	Massive dolomite	364.486	853.084	81626.2	117.944	111.028	192897	2.05607	6.72897
65j	Massive dolomite	513.655	795.984	82650.6	178.916	123.092	192550	3.21285	513.855
65m	Massive dolomite	1145.63	933.01	87029.1	75.3398	103.301	198447	3.30097	21.9417
65n	Massive dolomite	1693.84	672.309	82594.3	195.768	130.819	188960	5.51978	9.56762
68c	Massive dolomite	820.304	593.928	80170.8	735.674	174.383	218596	5.6926	16.888
68k	Massive dolomite	2250	530.577	81307.7	1046.54	228.462	195769	11.9231	11.5385
68p-1	Massive dolomite	1042.91	407.573	84019.4	594.369	303.689	209126	7.18447	26.4078
74a	Massive dolomite	2227.72	739.406	97564.4	579.01	141.188	211881	3.9604	30.8911
74b	Massive dolomite	2464.02	1011.74	90833.3	284.848	92.6136	185625	2.84091	18.3712
82a	Massive dolomite	493.113	587.144	81818.2	395.776	133.517	194674	4.77502	13.0395
82d	Massive dolomite	313.91	571.429	80357.1	203.571	135.902	202256	4.69925	369.173
82e	Massive dolomite	1940.52	492.007	83457.2	407.807	293.123	199442	5.20446	508.55
82f	Massive dolomite	1782.8	552.4	79180	1087	149.4	185580	18.2	12.8
82g	Massive dolomite	674.747	855.758	101556	333.131	225.859	245657	3.23232	19.798
82j-1	Massive dolomite	132.231	319.192	77832.9	184.022	151.699	196143	2.38751	25.8953
82j-2	Massive dolomite	273.157	255.766	82362.9	246.125	188.658	201134	6.99433	7.18336
82k-1	Massive dolomite	297.8	246	83520	433	187	204600	6.2	88.2
84a1	Massive dolomite	835.34	470.68	82388.3	748.155	191.068	202136	5.43689	160.388
84b1	Massive dolomite	2916.34	548.833	70116.7	530.35	189.105	203891	21.0117	19.6498
84c1	Massive dolomite	1792.64	664.581	80276	621.895	133.211	190616	11.7755	13.4315
87b	Massive dolomite	1081.73	1316.35	82192.3	133.462	126.923	212115	6.73077	15.1923
jh19a	Massive dolomite	879.084	1117.93	83187.3	480.677	127.832		11.1783	200.46
jh34a	Massive dolomite	368.818	496.127	69016.9	192.453	1211.08		3.28024	765.893
jh34b	Massive dolomite	247.952	856.344	90509.5	38.7612	74.8785		0.580387	349.2
jh34c	Massive dolomite	335.259	479.681	90398.4	28.4861	133.629		0.558638	590.034
jh34d	Massive dolomite	70.7171	249.602	88964.1	35.4582	94.4247		0.735755	102.663
jh34e	Massive dolomite	410.505	207.73	89256.7	22.9931	109.164		0.662742	283.293
jh40g	Massive dolomite	1743.77	473.38	56251.2	279.761	334.651		3.65449	388.217
jh40h	Massive dolomite	888.867	1561.43	85029.8	246.918	132.789		9.77809	459.724
73a-1	Massive dolomite	3169.81	480.189	78132.1	469.623	189.057	195283	11.3208	167.358
73e-2	Massive dolomite	1222.44	355.513	86021.1	474.017	268.648	215724	6.51965	39.3097
73f1	Massive dolomite	1979.15	358.491	80516.4	944.191	235.551	199801	5.36246	103.674
73f2	Massive dolomite	4233.66	804.554	88415.8	1222.57	198.416	197485	9.50495	217.822
73g	Massive dolomite	3204.14	1070.18	85719.7	339.04	192.662	189652	10.5362	215.992
76a	Massive dolomite	848.804	422.201	82890	481.914	245.167	197129	3.0622	24.689
76c-1	Massive dolomite	4159.46	1697.21	86628.2	572.334	91.8348	190202	14.6013	237.272
5b-1	Massive dolomite	635.785	278.926	83837	519.085	156.992		2.48244	28.8877
JH-5A	Massive dolomite	1078.17	527.617	82313.1	574.477	184.381		5.07148	296.874
87a	Massive dolomite	170.099	1023.76	83465.3	148.515	267.921	235248	6.13861	49.1089
65q	Massive dolomite	918.243	591.213	46456.5	506.399	178.415	266476	6.1127	8.40497
65t	Massive dolomite	1108.63	692.745	87843.1	688.039	150.784	199216	4.11765	7.05882
65v-3	Massive dolomite	431.765	296.078	84607.8	226.667	144.51	200980	1.96078	8.82353
65x-2	Massive dolomite	701.154	192.308	88826.9	674.423	291.538	241538	3.84615	14.4231
68a	Massive dolomite	1540.2	307.525	83980.2	694.059	221.98	194812	6.93069	35.0495
68e	Massive dolomite	686.184	362.899	80850.2	669.372	173.527	207536	6.18357	14.1063
68b-1	Massive dolomite	951.745	267.797	84187.4	1295.71	224.128	202193	10.3689	41.0768
68t	Massive dolomite	686.66	295.286	85957.9	691.274	173.922	200602	6.61986	266.8
82n	Massive dolomite	704.2	770.4	88540	479.6	280.4	235200	6.8	67.4
82p-2	Massive dolomite	184.808	498.077	89096.2	197.885	123.462	229231	3.26923	29.0385

## Sheet: Formation depths and perm
		Thickness	Permeability (X m2)	Permeability (X- D)	Permeability (X- mD)	Permeability (Z m2)
				1013249966000
	Nukhul	200	1 x 10-14	0.0101325	10.1325	5 x 10-15
	Tanka	100	9 x 10-16	0.000911925	0.911925	9.8 x 10-18
	Darat	200	9 x 10-16	0.000911925	0.911925	9.8 x 10-18
	Thebes	400	2.2 x 10-15	0.00222915	2.22915	9.8 x 10-18
	Sudr	200	9.4 x 10-16	0.000952455	0.952455	9.8 x 10-18
	Matulla	100	3.8 x 10-14	0.0385035	38.5035	3.5 x 10-16
	Raha and Wata	300	7.9 x 10-14	0.0800467	80.0467	1.8x 10-14
	Nubian	600	3.9 x 10-12	3.95167	3951.67	2 x 10-12
	PreCarb	300	2.9 x 10-13	0.293842	293.842	9.8 x 10-14
	Fractured basement	900	1 x 10-19	1.01325e-07	0.000101325	1 x 10-19
	Basement	100	1 x 10-19	1.01325e-07	0.000101325	1 x 10-19
	Data for Thebes Formation measured inhouse
	Raha and Wata Fm:
	Hassanain, I. M., Abdou, M. I., & Abu Seda, H. H. (2012). Petrographical and Petrophysical Studies of Some Upper Cretaceous Rocks, Southwest Sinai, Egypt. Petroleum Science and Technology, 30(1), 64-73.
	Matulla and Duwi Fm:
	Mousa, A. S., El-Hariri, T. Y., & Assy, E. M. A. (2011). Sedimentological and petrophysical characteristics of Raha Formation at Wadi Tubia, Northern Gulf of Aqaba, Sinai, Egypt. Egyptian Journal of Petroleum, 20(2), 79-87.
	Nubian
	Nabawy, B, Geraud, Y., Rochette, P and Bur, N, 2009, Pore throat characterization in highly porous and permeable sandstones: The American Association of Petroleum Geologists Bulletin, v. 93, p. 719-739, doi:10.1306/03160908131.
